# Supplementary material
Source: MDPI journal article supplement (https://www.mdpi.com/2076-0760/8/11/301)
Supplement: s1 [file s1]

## Sheet: V0_lab_utente
Skill tutor anno 0
indicators	Participant 1	Participant 2	Participant 3	Participant 4	Participant 5	Participant 6	Participant 7	Participant 8	Participant 9
1	5	5	5	5	5	5	5	5	5
2	5	5	5	5	5	5	5	5	5
3	4	5	5	5	5	5	5	5	5
4	4	5	5	5	5	5	5	5	5
5	5	4	3	5	5	3	5	5	5
6	5	3	4	5	5	5	5	5	5
7	4	4	3	5	5	5	5	5	5
8	5	4	4	5	4	5	5	5	5
9	5	5	5	5	5	5	5	4	5
10	5	5	5	5	5	4	4	5	5
11	5	5	3	5	5	4	5	5	5
12	5	4	4	5	5	5	4	5	5
13	4	5	4	5	4	4	3	5	5
14	5	5	5	5	4	4	5	5	5
15	5	5	5	5	5	4	5	5	5
Skill trainer anno 0
indicators	Participant 1	Participant 2	Participant 3	Participant 4	Participant 5	Participant 6	Participant 7	Participant 8	Participant 9
1	2	3	1	5	2	4	5	2	1
2	2	1	1	4	2	3	5	4	2
3		5	1	4		3			1
4		1	1	4		3			1
5	5	1	1	4	2	3	5	3	4
6	2	1	1	5	2		5	2	1
7	3	3	2	5	4	3	5	5	3
8	2	1	1	4	2	2	5	2	1
9	5	5	5	5	5	4	5	5	5
10	5	4	3	5	2	4	5	5	5
11	4	5	5	5	4	4	5	5	5
12	5	2	4	5	3	4	4	5	4
13	5	3	5	5	3	4	5	5	5
14	3	4	1	4	2	2	5	2	1
15	5	5	5	4	5	4	5	3	3
16		4	1	5		4			1
17	4	4	1	5	2	4	5	5	3
18	4	1	1	5	2	4	5	5	1
19	5	2	5	5	5	4	5	5	3
20	5	4	5	5	5	4	5	5	4
21	5	5	1	5	4	4	5	5	5

## Sheet: V0_lab_tutor_V0_lab_trainer
V0_lab_tutor
indicators	Participant 1	Participant 2	Participant 3	Participant 4	Participant 5	Participant 6	Participant 7	Participant 8	Participant 9
1	5	5	5	4	5	5	5	5	5
2	5	5	5	5	5	5	5	5	5
3	4	4	5	3	5	3	4	5	5
4	4	5	5	4	5	4	5	5	5
5	5	4	3	4	5	3	5	5	3
6	5	3	3	3	5	3	4	5	3
7	4	4	3	3	5	4	5	5	3
8	5	3	4	3	4	3	4	5	3
9	5	5	5	5	5	4	5	5	4
10	5	3	5	5	5	4	5	3	5
11	5	4	4	5	5	4	5	3	3
12	5	4	3	4	5	4	4	5	4
13	4	4	3	4	4	4	3	5	3
14	5	4	4	4	4	3	3	5	3
15	5	4	5	4	5	4	5	5	4
V0_lab_trainer
indicators	Participant 1	Participant 2	Participant 3	Participant 4	Participant 5	Participant 6	Participant 7	Participant 8	Participant 9
1	2	3	1	3	2	3	5	3	1
2	2	1	2	2	2	3	5	4	2
3		5	2	2		2			1
4		1	2	2		3			1
5	5	1	2	2	2	2	5	3	3
6	2	1	2	3	2		5	3	1
7	3	3	2	3	4	3	5	5	3
8	2	1	2	3	2	2	5	2	1
9	5	5	4	3	5	4	4	5	3
10	5	4	3	3	2	3	5	5	3
11	4	4	3	3	4	4	5	5	3
12	5	3	4	2	3	4	4	5	3
13	5	3	5	3	3	3	5	5	3
14	3	4	1	3	2	2	5	3	1
15	5	5	3	3	5	4	4	3	3
16		4	1	2		4			1
17	4	4	1	3	2	3	4	5	3
18	4	1	1	4	2	3	5	5	1
19	5	3	5	5	5	3	5	4	3
20	5	4	5	5	5	4	5	5	4
21	5	5	3	5	4	4	5	5	3

## Sheet: VF_lab_tutor_VF_lab_trainer
VF_lab_tutor
indicators	Participant 1	Participant 2	Participant 3	Participant 4	Participant 5	Participant 6	Participant 7	Participant 8	Participant 9
1	5	5	5	4	5	5	5	5	5
2	5	5	5	5	5	5	5	5	5
3	5	4	5	3	5	4	3	5	5
4	5	5	5	4	5	4	5	5	5
5	5	5	3	4	5	4	5	5	4
6	5	3	3	3	5	4	3	5	4
7	5	4	3	3	5	4	4	5	5
8	5	3	4	3	3	4	4	5	4
9	5	5	5	5	5	4	5	5	4
10	4	4	4	5	5	5	4	5	5
11	4	4	4	5	5	5	3	5	5
12	5	5	3	3	5	5	3	5	5
13	4	4	3	3	3	4	3	5	4
14	4	4	3	3	3	5	3	5	5
15	5	5	5	4	5	5	5	5	5
VF_lab_trainer
indicators	Participant 1	Participant 2	Participant 3	Participant 4	Participant 5	Participant 6	Participant 7	Participant 8	Participant 9
1	4	3	2	3	4	5	4	5	2
2	2	1	2	2	3	4	4	4	2
3		5	2			3			1
4		1	2			4			1
5	5	2	2	2	4	4	5	5	3
6	4	3	2	3	3		4	5	3
7	4	4	2	3	4	4	5	5	3
8	4	3	2	3	3	4	3	4	3
9	5	5	4	3	4	4	4	5	4
10	5	4	3	3	5	4	5	5	4
11	4	4	3	3	5	4	3	5	4
12	5	3	4	2	2	4	2	5	4
13	5	3	3	3	5	4	5	5	4
14	5	4	1	3	4	3	5	5	2
15	5	5	3	3	4	4	3	5	4
16		4	1			5			1
17	5	5	2	3	3	4	4	5	4
18	5	4	2	3	3	4	5	5	4
19	5	3	5	4	5	4	4	4	4
20	5	4	5	3	5	5	4	5	5
21	5	5	4	5	5	5	5	5	5

## Sheet: V0_stage_utente
Skill tutor anno 0
indicators	Participant 1	Participant 2	Participant 3	Participant 4	Participant 5	Participant 6	Participant 7	Participant 8	Participant 9
1	5	3	5	5	5	5	5	4	5
2	5	3	5	4	5	4	5	4	5
3	5	3	4	5	4	4	5	4	5
4	5	3	5	5	5	4	5	4	5
5	4	4	5	5	5	4	5	4	5
6	4	3	5	5	3	3	5	4	5
7	5	4	4	5	5	4	5	4	5
8	4	4	5	5	4	3	5	4	5
9	5	5	5	5	4	5	5	4	5
10	5	5	5	5	5	5	5	4	5
11	5	3	4	4	5	4	5	4	5
12	4	4	5	5	5	5	5	4	5
13	4	4	4	5	3	4	5	4	5
14	4	4	5	5	4	4	5	4	5
15	5	3	5	5	5	5	5	4	5
Skill trainer anno 0
indicators	Participant 1	Participant 2	Participant 3	Participant 4	Participant 5	Participant 6	Participant 7	Participant 8	Participant 9
1	4	3	3			1	5	4	4
2	4	2	2			1	3	3	1
3		3				4
4						5
5	5	3	1			4	3		1
6	4		1			1	3	4	1
7	4	4	1	4	3	1	5	4	3
8	5	4	1			1	5	4	3
9	5	3	4	5	4	4	5	4	5
10	5	4	4	4	3	3	5	4	5
11	4	3	5	4	4	4	5	4	5
12	4	3	4	5	3	4	5	4	3
13	4	3	5	5	3	4	5	4	5
14			1			1	5	4
15		3	3		3	3	5	4	3
16		3				5
17		3	3	5	3	4	5	4
18		3	1	5	4	4	5
19	4	5	4	4	3	4	5		5
20	4	5	4	5	5	4	5		5
21	4	4	2	5	5	4	5		5

## Sheet: V0_stage_tutor_V0_stage_trainer
V0_stage_tutor
indicators	Participant 1	Participant 2	Participant 3	Participant 4	Participant 5	Participant 6	Participant 7	Participant 8	Participant 9
1	5	3	5	5	5	4	5	4	5
2	5	4	5	4	5	4	4	4	5
3	5	3	4	4	4	4	3	3	3
4	4	3	4	5	5	5	4	3	5
5	5	3	4	4	5	4	4	4	3
6	4	3	4	4	3	4	4	3	3
7	5	3	5	4	5	5	4	3	3
8	5	3	4	4	4	3	4	3	2
9	5	3	4	4	3	5	4	3	4
10	3	4	3	1	5	5	4	2	4
11	3	3	3	1	5	4	4	3	4
12	4	4	5	4	5	4	4	3	3
13	4	4	4	4	3	4	3	3	2
14	4	3	4	4	4	3	4	3	2
15	5	3	4	4	5	4	4	3	5
V0_stage_trainer
indicators	Participant 1	Participant 2	Participant 3	Participant 4	Participant 5	Participant 6	Participant 7	Participant 8	Participant 9
1	4	3	4			1	4	3	2
2	4	3	3			1	3	3	1
3		3				3
4						4
5	3	3	2			3	3	3	1
6	3		2			2	3	3	1
7	4	4	2	3	3	2	3	3	2
8	4	4	3			3	3	3	1
9	4	3	4	4	4	3	3	3	3
10	4	4	5	4	3	3	3	3	2
11	3	3	4	4	4	3	2	3	3
12	3	2	4	4	3	3	3	3	1
13	4	3	4	3	3	4	3	3	2
14	3		2			2	3	3
15	3	3	3		3	3	2	3	3
16		4				4
17	3	4	4	3	3	4	3	3
18		4	4	3	4	3	3	3
19	4	3	4	4	3	4	4	3	3
20	3	4	4	3	5	5	4	3	4
21	4	3	4	4	5	4	4	3	5

## Sheet: VF_stage_tutor_VF_stage_trainer
VF_stage_tutor
indicators	Participant 1	Participant 2	Participant 3	Participant 4	Participant 5	Participant 6	Participant 7	Participant 8	Participant 9
1	5	3	5	5	5	5	4	4	3
2	5	4	5	4	5	5	4	4	4
3	5	2	4	4	4	4	3	4	2
4	4	2	4	5	5	5	3	3	3
5	5	3	4	2	5	4	4	4	2
6	4	3	4	3	4	4	3	3	1
7	5	3	5	3	5	5	4	4	1
8	5	3	4	4	5	4	3	3	1
9	5	4	5	4	3	5	4	3	2
10	4	4	5	2	5	5	4	3	4
11	4	3	5	2	5	4	4	3	2
12	5	4	5	4	5	4	4	3	1
13	4	4	4	5	4	4	3	3	1
14	4	3	4	5	5	5	3	3	1
15	5	3	4	5	5	4	4	3	2
VF_stage_trainer
indicators	Participant 1	Participant 2	Participant 3	Participant 4	Participant 5	Participant 6	Participant 7	Participant 8	Participant 9
1	4	4	4			2	4	3	1
2	4	4	3			3	3	3	1
3		4				4
4						5
5	4	4	3			4	3	3	1
6	3		3			2	4	3	1
7	4	4	3	4	4	2	4	3	2
8	4	4	4			5	4	3	1
9	4	4	5	4	4	4	4	3	1
10	4	4	5	4	4	4	3	3	1
11	4	3	5	4	4	4	2	3	1
12	4	3	4	4	4	4	2	3	1
13	5	4	4	4	4	4	4	3	1
14	3		4			3	4	3
15	3	3	3		4	4	3	3	1
16		4				5
17	4	4	4	3	4	4	4	3
18		4	4	3	4	4	4	3
19	4	4	4	4	4	5	3	3	3
20	4	4	4	4	5	5	3	3	2
21	4	4	5	4	5	5	5	3	5
